# Supplementary material for: Anion-induced chiral assembly: construction of Ag(i) coordination polymers for photocatalytic degradation of organic dyes
Source: Royal Society of Chemistry journal article supplement (doi:10.1039/d4tc03372h), 2024-10-24
Supplement: d4tc03372h1.pdf [file d4tc03372h1.pdf]

## **Supplementary Information**

### **Anion-induced chiral assembly: construction of Ag(I) coordination polymers for photocatalytic degradation of organic dyes**

Chao Huang\*, Jin-Xia Liang and Bi-Xue Zhu\*

*Key Laboratory of Macrocyclic and Supramolecular Chemistry of Guizhou Province, Guizhou University,  
Guiyang 550025, China*

\*E-mail: [chuang1@gzu.edu.cn](mailto:chuang1@gzu.edu.cn) (C. Huang); [bxzhu@gzu.edu.cn](mailto:bxzhu@gzu.edu.cn) (B.-X. Zhu)



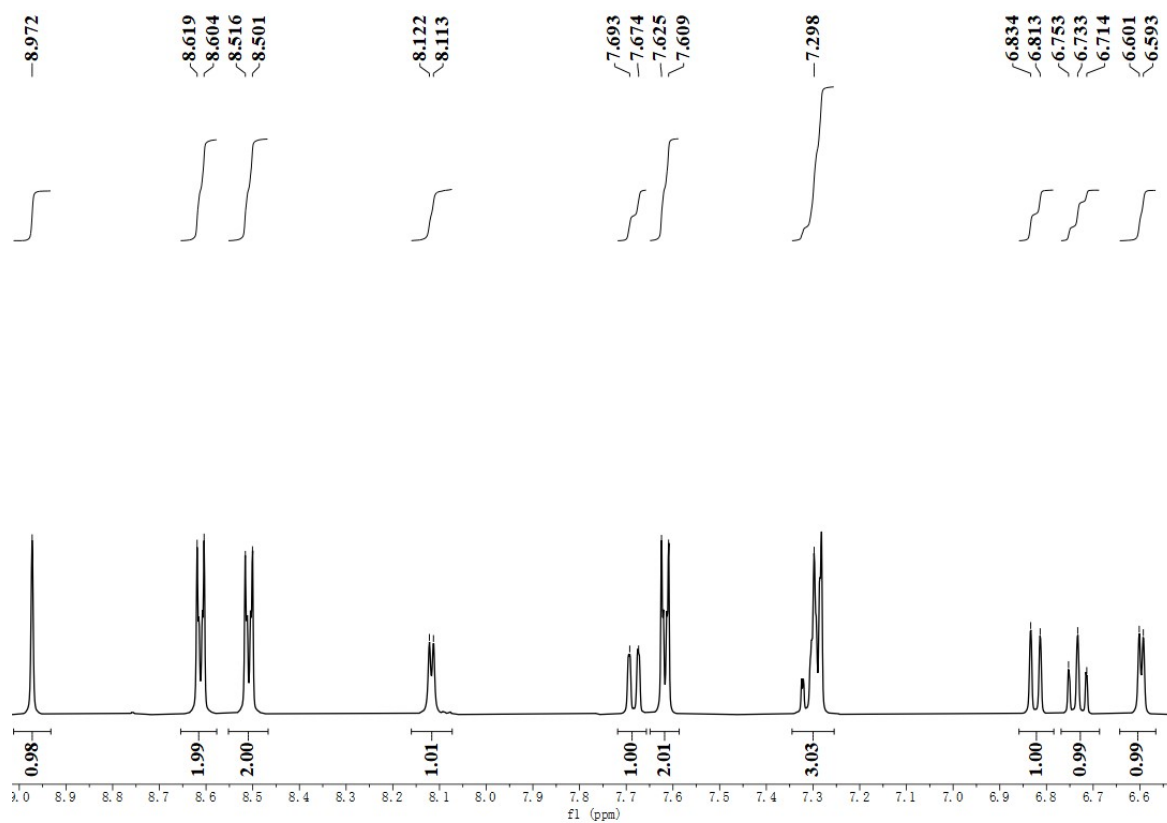

Fig. S1.  $^1\text{H}$  NMR for L.

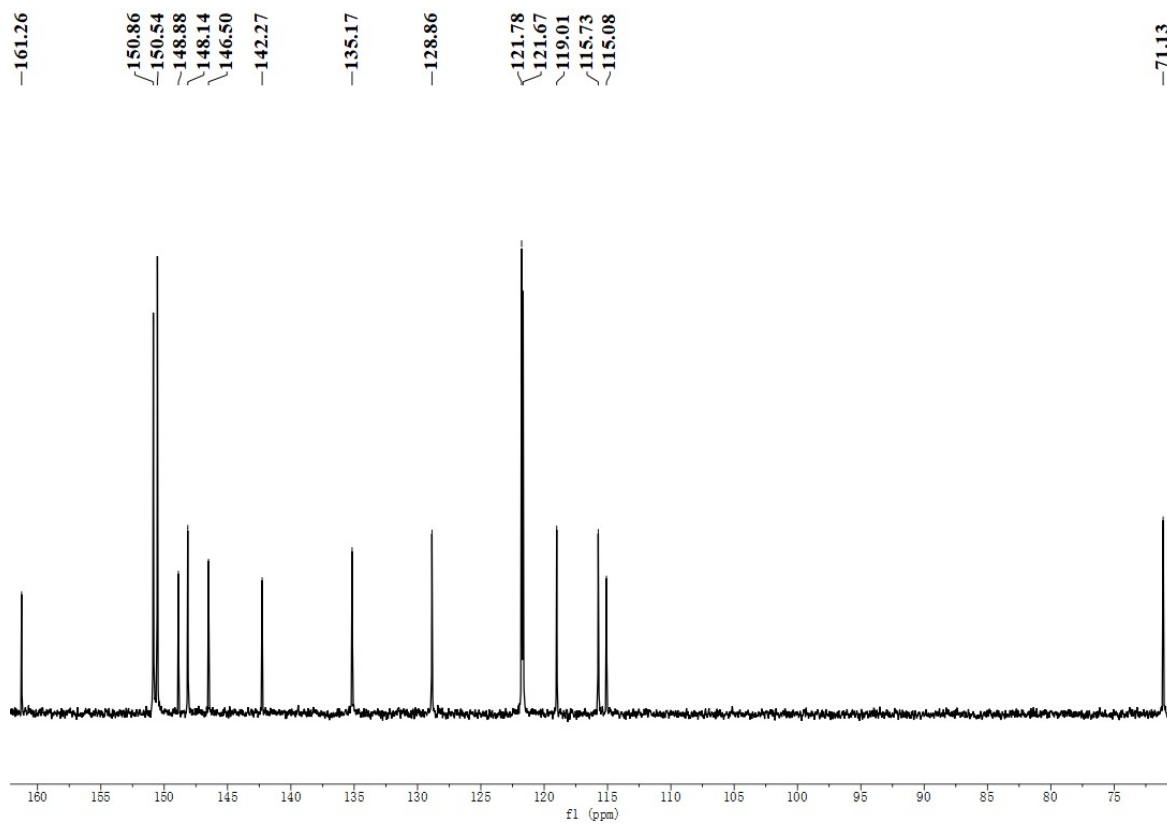

Fig. S2.  $^{13}\text{C}$  NMR for L.

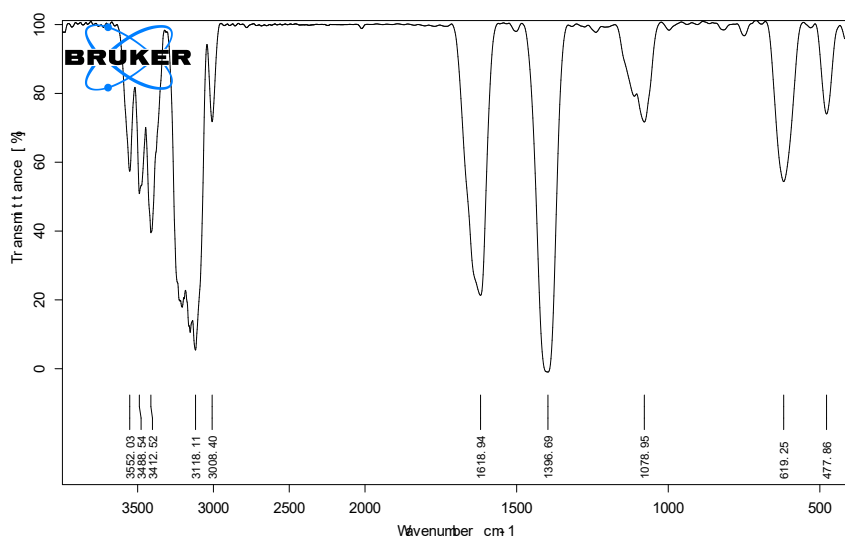

Fig. S3. IR spectra for CP 2.

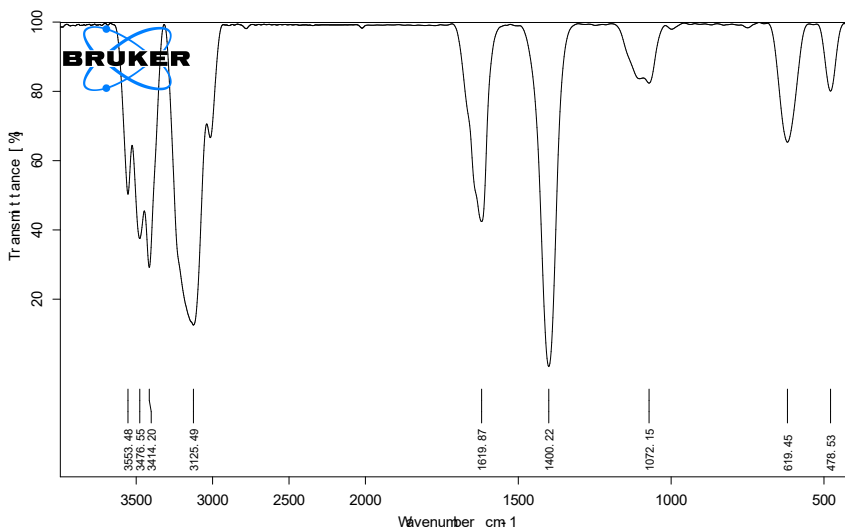

Fig. S4. IR spectra for CP 3.

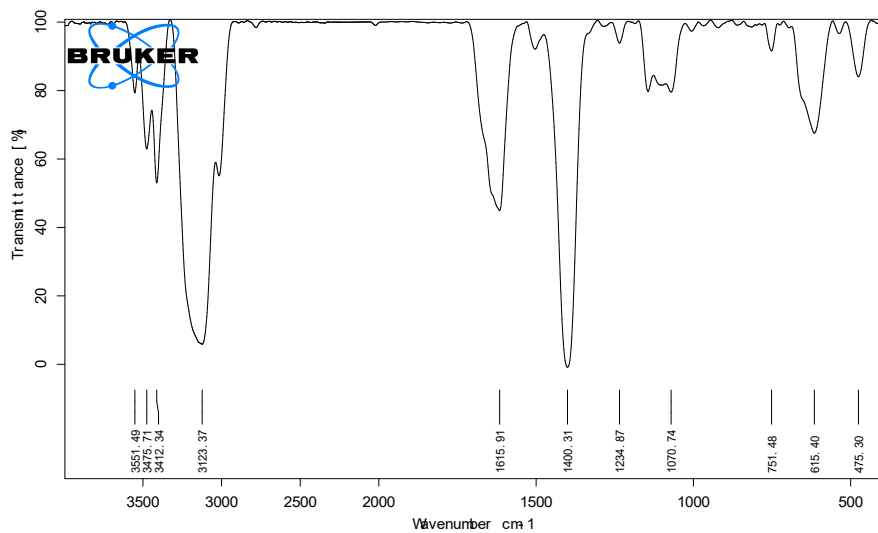

Fig. S5. IR spectra for CP 4.

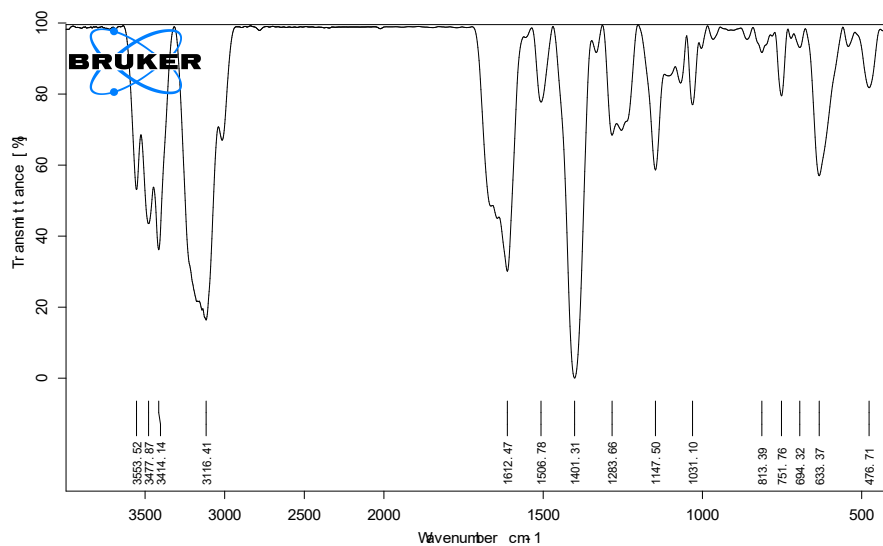

Fig. S6. IR spectra for CP 5.

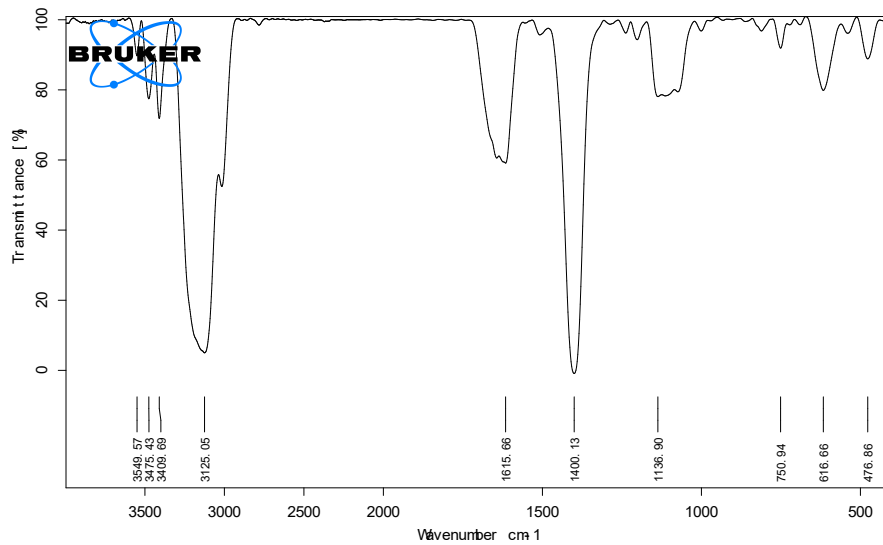

Fig. S7. IR spectra for CP 6.

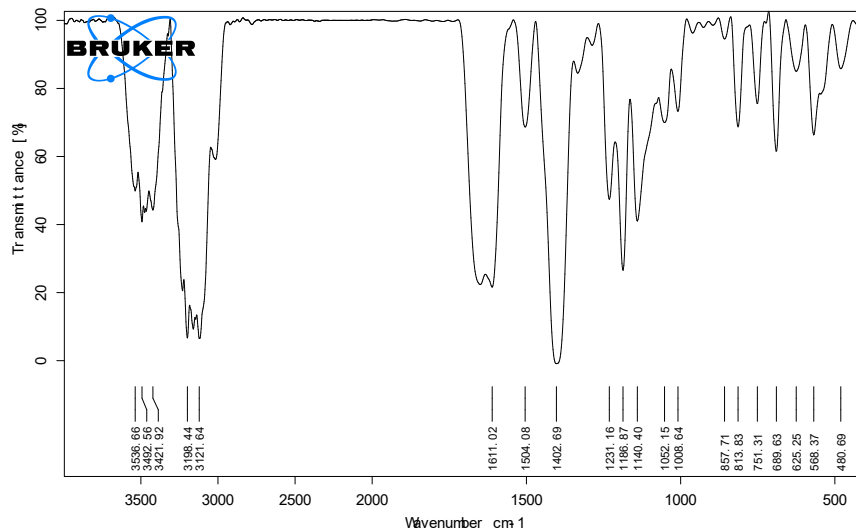

Fig. S8. IR spectra for CP 7.

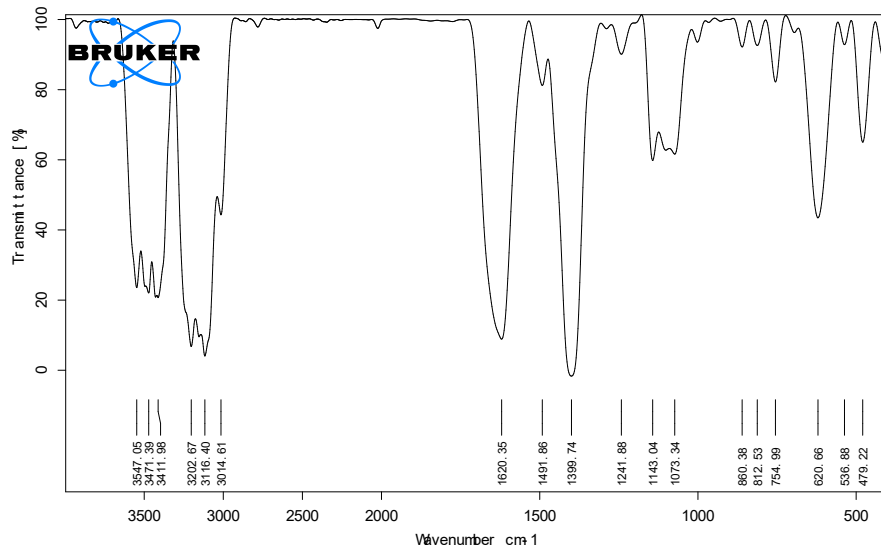

Fig. S9. IR spectra for CP 8.

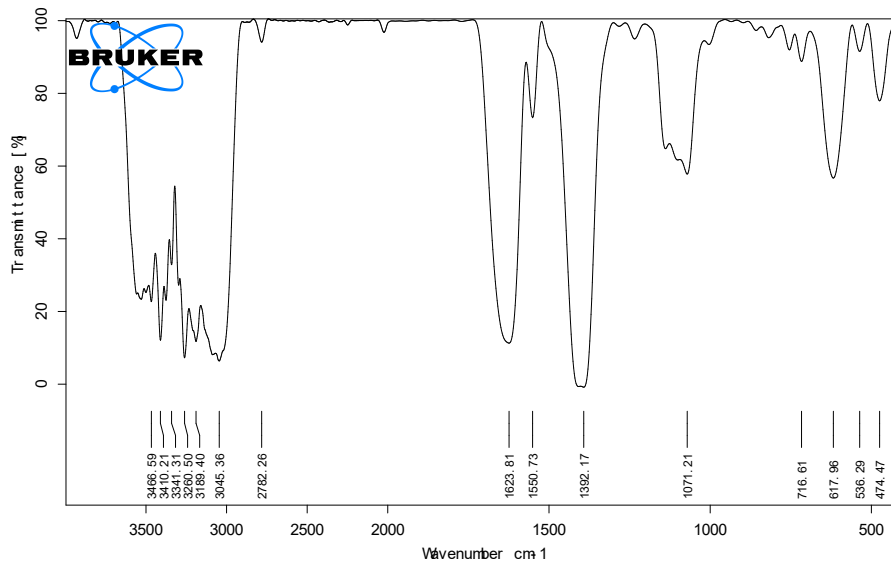

Fig. S10. IR spectra for CP 9.

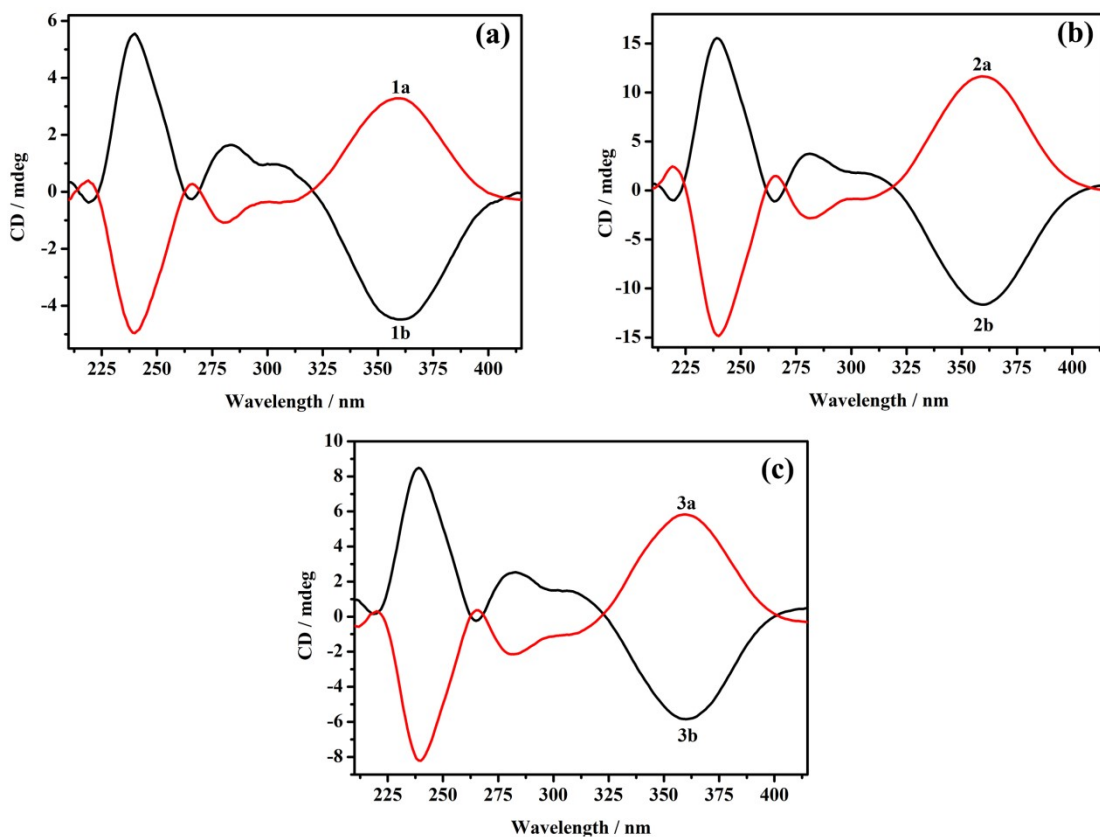

**Fig. S11.** CD spectra of CPs **1a** and **1b** (a), **2a** and **2b** (b), and **3a** and **3b** (c) in MeCN solution.

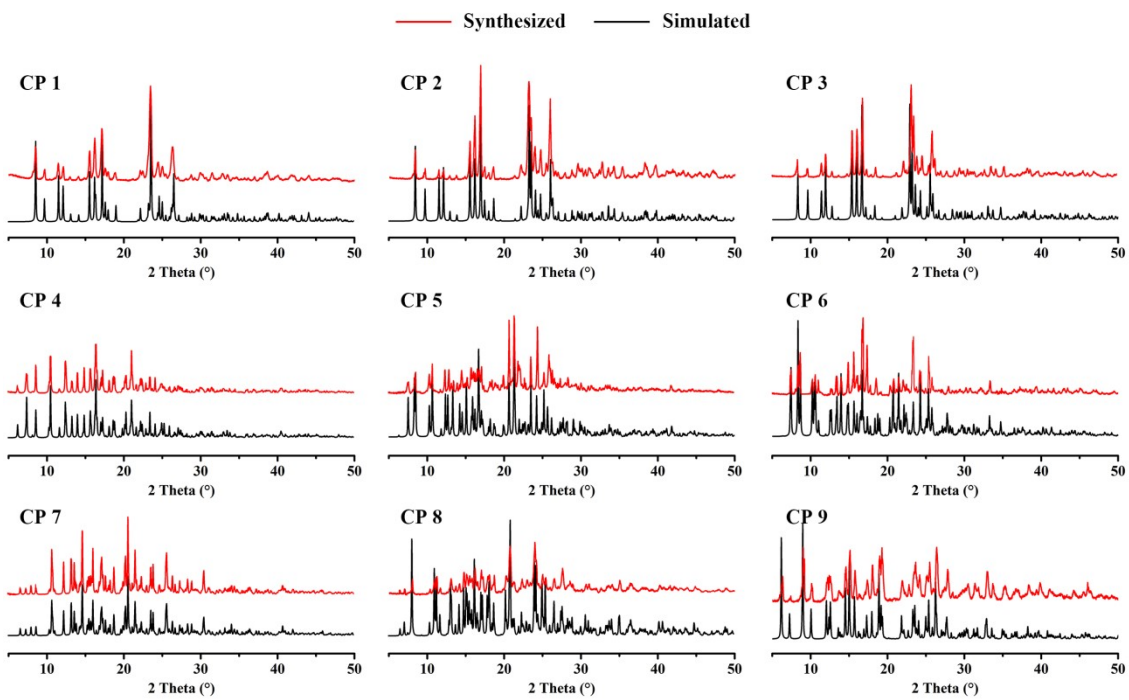



**Fig. S12.** PXRD patterns: synthesized and simulated from the single-crystal diffraction data.

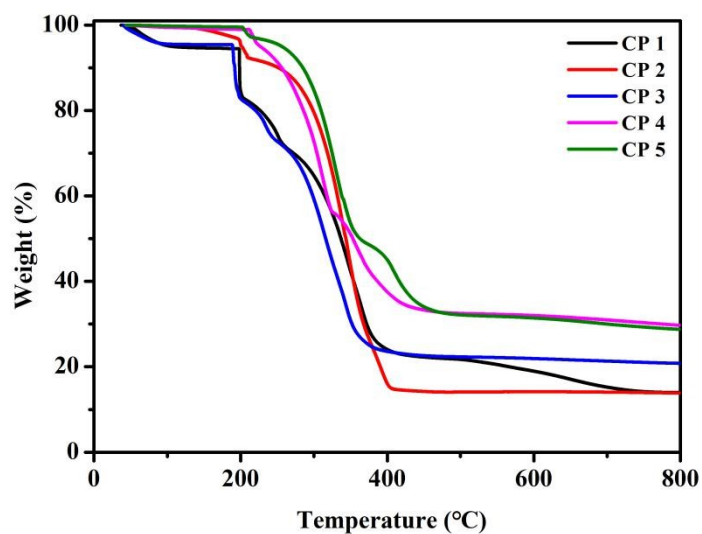

**Fig. S13.** TGA curves for CPs 1–5.

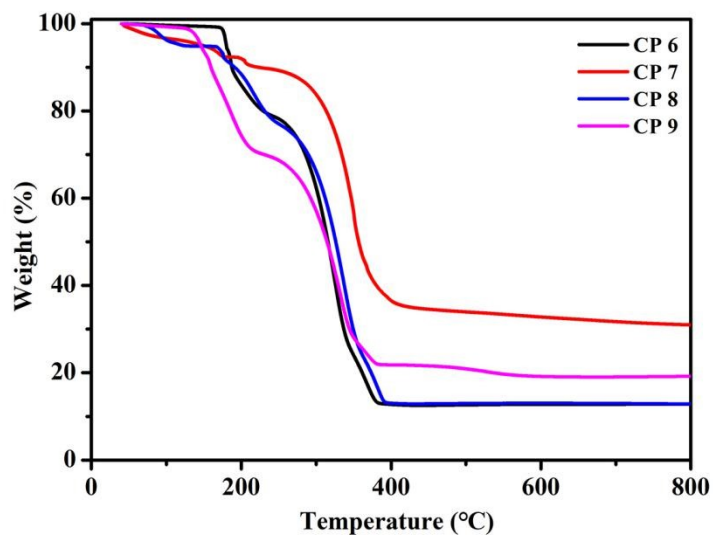

**Fig. S14.** TGA curves for CPs 6–9.

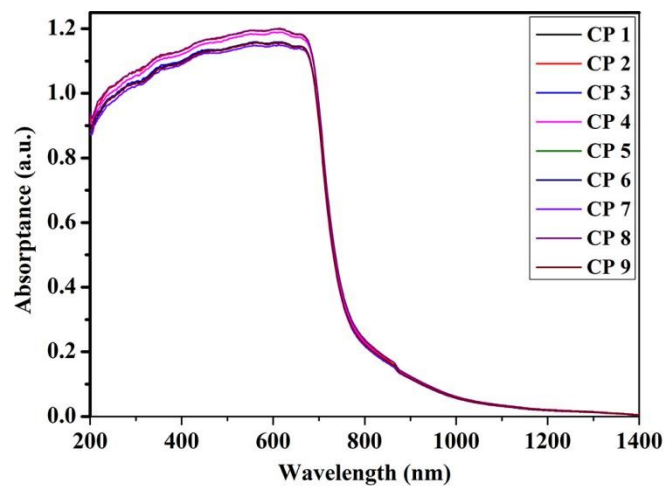

**Fig. S15.** The solid-state UV–Vis spectra of CPs 1–9.

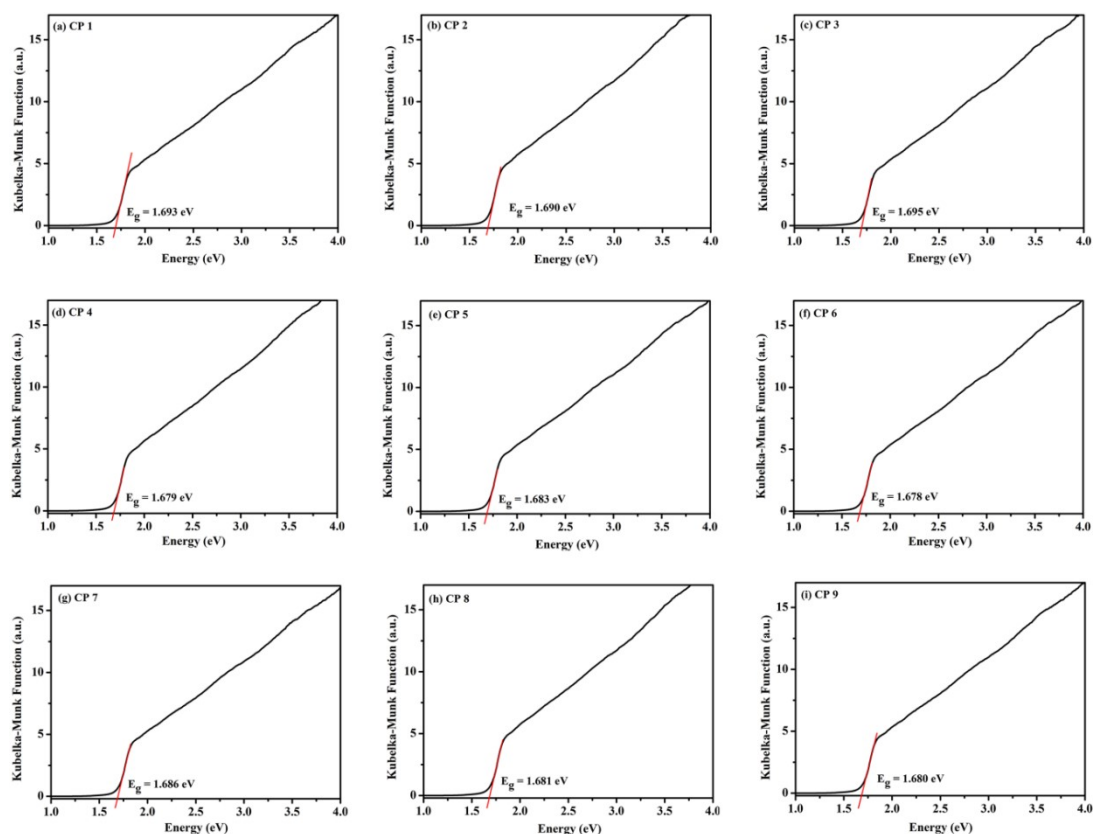

**Fig. S16.** UV–Vis diffuse-reflectance spectra of Kubelka-Munk functions vs. Energy for CPs 1–9.

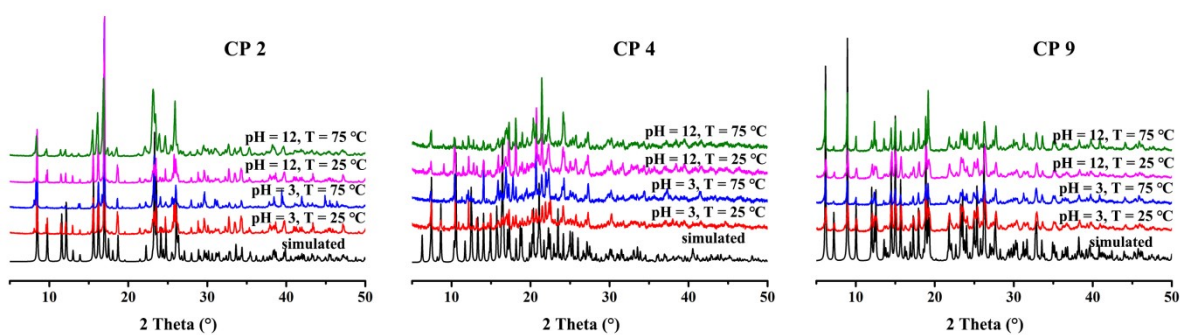

**Fig. S17.** PXRD patterns of CPs 2, 4, and 9 after immersion in different aqueous solutions.

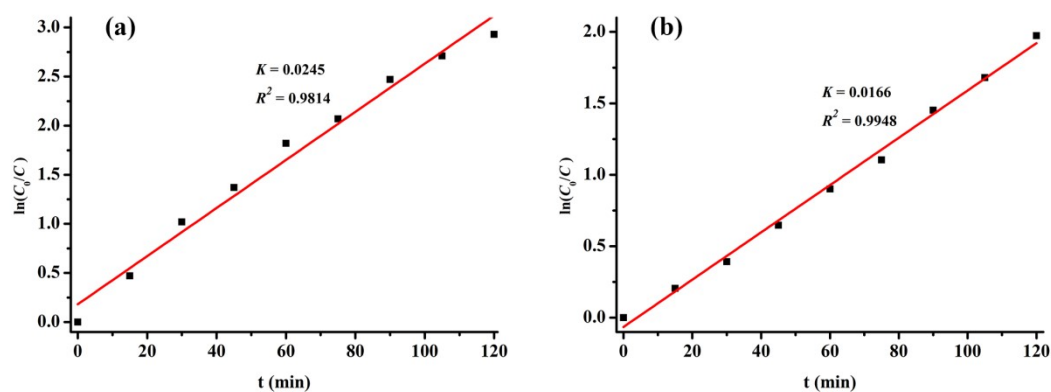

Fig. S18. Kinetic fitting curves of degradation reaction of RhB (a) and MB (b) in the presence of CP 4.

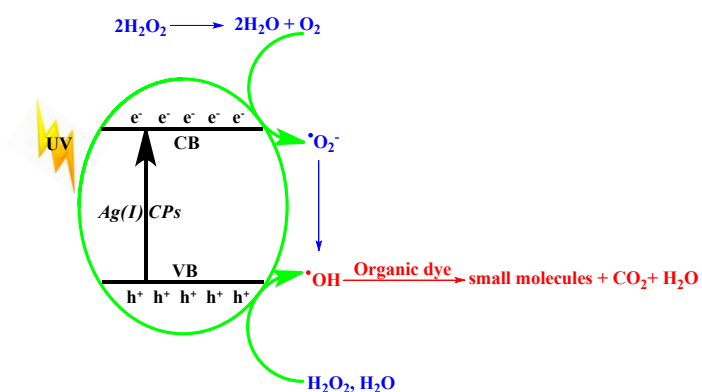

Fig. S19. Proposed mechanism for the photocatalytic degradation process of RhB and MB in water.

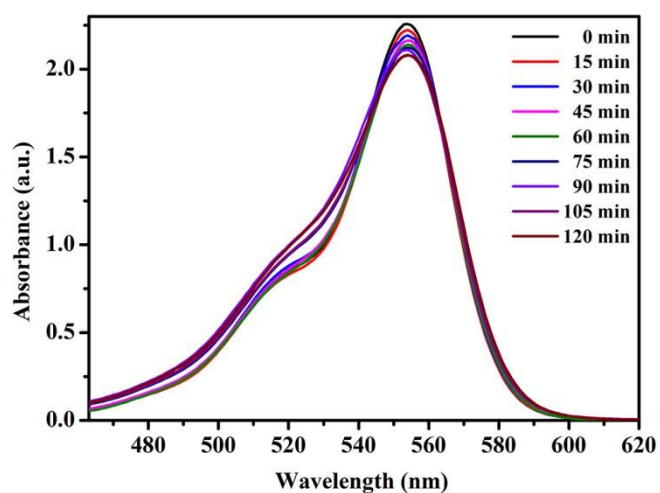

Fig. S20. UV-Vis spectra of RhB in the presence of CP 4,  $\text{H}_2\text{O}_2$ , and 0.2 mL of TBA under UV irradiation.

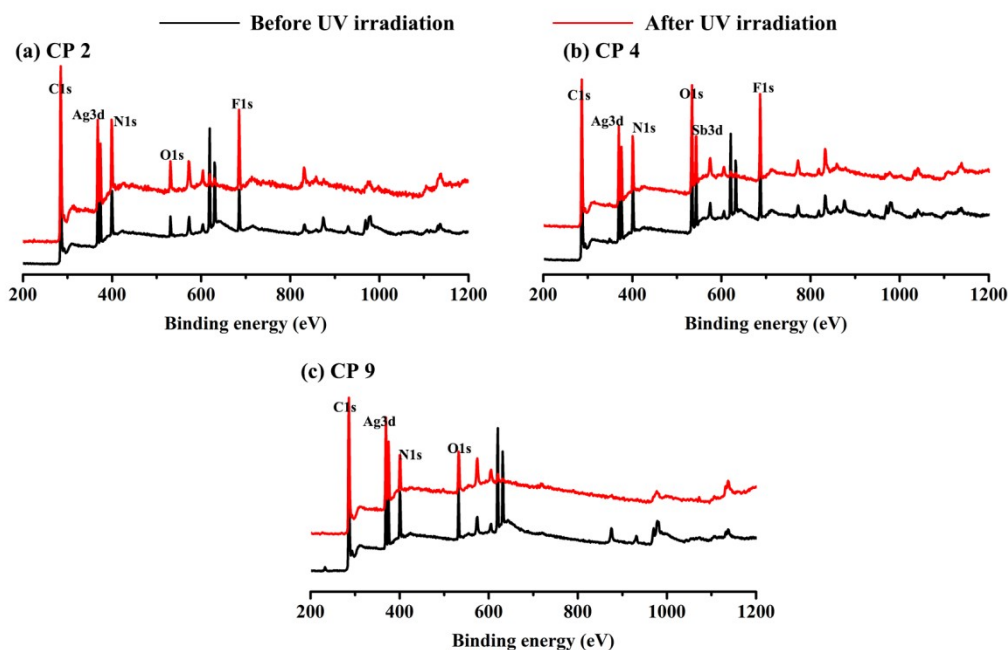

**Fig. S21.** Fully scanned X-ray photoelectron spectroscopy (XPS) of CPs **2** (a), **4** (b), and **9** (c) before and after the photocatalytic degradation reaction.

**Table S1.** Selected bond distances (Å) and angles (°) for CP **2**–**9**.

|              |          |              |            |             |            |
|--------------|----------|--------------|------------|-------------|------------|
| <b>CP 2a</b> |          |              |            |             |            |
| Ag1–N5       | 2.267(3) | N5–Ag1–N5a   | 142.30(18) | N5–Ag1–N1b  | 106.46(12) |
| Ag1–N5a      | 2.267(3) | N5a–Ag1–N1b  | 98.10(12)  | N5–Ag1–N1c  | 98.10(12)  |
| Ag1–N1c      | 2.423(3) | N5a–Ag1–N1c  | 106.46(12) | N1c–Ag1–N1b | 97.92(17)  |
| Ag1–N1b      | 2.423(3) |              |            |             |            |
| <b>CP 2b</b> |          |              |            |             |            |
| Ag1–N1a      | 2.422(3) | N1a–Ag1–N1b  | 98.01(15)  | N5c–Ag1–N1b | 106.22(11) |
| Ag1–N1b      | 2.422(3) | N5–Ag1–N1a   | 106.22(11) | N5–Ag1–N1b  | 98.10(11)  |
| Ag1–N5       | 2.266(3) | N5c–Ag1–N1a  | 98.10(11)  | N5–Ag1–N5c  | 142.63(15) |
| Ag1–N5c      | 2.266(3) |              |            |             |            |
| <b>CP 3a</b> |          |              |            |             |            |
| Ag1–N1a      | 2.432(3) | N1a–Ag1–N1b  | 97.14(16)  | N5–Ag1–N1a  | 98.19(12)  |
| Ag1–N1b      | 2.432(3) | N5–Ag1–N1b   | 106.29(12) | N5c–Ag1–N1a | 106.29(11) |
| Ag1–N5       | 2.268(3) | N5c–Ag1–N1 b | 98.19(12)  | N5–Ag1–N5c  | 142.73(17) |
| Ag1–N5c      | 2.268(3) |              |            |             |            |
| <b>CP 3b</b> |          |              |            |             |            |
| Ag1–N1a      | 2.433(4) | N1a–Ag1–N1b  | 97.06(18)  | N5c–Ag1–N1b | 98.37(14)  |
| Ag1–N1b      | 2.433(4) | N5–Ag1–N1a   | 98.37(14)  | N5c–Ag1–N1a | 106.31(14) |
| Ag1–N5       | 2.262(3) | N5–Ag1–N1b   | 106.31(14) | N5–Ag1–N5c  | 142.4(2)   |
| Ag1–N5c      | 2.262(3) |              |            |             |            |
| <b>CP 4</b>  |          |              |            |             |            |
| Ag1–N1a      | 2.411(4) | N1a–Ag1–N10b | 96.43(15)  | N6–Ag1–N5   | 135.90(14) |
| Ag1–N6       | 2.268(4) | N6–Ag1–N1a   | 115.44(14) | N5–Ag1–N1a  | 98.71(14)  |
| Ag1–N5       | 2.293(4) | N6–Ag1–N10b  | 99.48(14)  | N5–Ag1–N10b | 103.68(15) |

|             |          |              |            |              |            |
|-------------|----------|--------------|------------|--------------|------------|
| Ag1-N10     | 2.436(4) |              |            |              |            |
| <b>CP 5</b> |          |              |            |              |            |
| Ag1-N5      | 2.284(3) | N5-Ag1-N1a   | 95.15(13)  | N6-Ag1-N5    | 137.02(14) |
| Ag1-N1a     | 2.436(4) | N5-Ag1-N10b  | 102.97(15) | N6-Ag1-N1a   | 117.43(13) |
| Ag1-N6      | 2.255(3) | N1a-Ag1-N10b | 94.76(14)  | N6-Ag1-N10b  | 101.43(14) |
| Ag1-N10b    | 2.444(4) |              |            |              |            |
| <b>CP 6</b> |          |              |            |              |            |
| Ag1-N5      | 2.294(4) | N5-Ag1-N10b  | 115.47(17) | N6-Ag1-N10b  | 98.58(16)  |
| Ag1-N6      | 2.285(5) | N5-Ag1-N1a   | 98.10(17)  | N6-Ag1-N1a   | 104.35(17) |
| Ag1-N10b    | 2.420(5) | N6-Ag1-N5    | 136.80(16) | N10b-Ag1-N1a | 95.77(16)  |
| Ag1-N1a     | 2.450(5) |              |            |              |            |
| <b>CP 7</b> |          |              |            |              |            |
| Ag1-N1a     | 2.441(3) | N5-Ag1-N1a   | 101.09(11) | N5-Ag1-N10b  | 110.65(10) |
| Ag1-N5      | 2.269(3) | N6-Ag1-N1a   | 109.41(11) | N6-Ag1-N5    | 131.83(11) |
| Ag1-N6      | 2.259(3) | N6-Ag1-N10b  | 103.35(10) | N10b-Ag1-N1a | 94.35(10)  |
| Ag1-N10b    | 2.418(3) |              |            |              |            |
| <b>CP 8</b> |          |              |            |              |            |
| Ag1-N1a     | 2.460(3) | N1a-Ag1-N10b | 98.18(9)   | N5-Ag1-N1a   | 97.75(10)  |
| Ag1-N5      | 2.261(3) | N5-Ag1-N10b  | 98.07(10)  | N6-Ag1-N1a   | 111.09(10) |
| Ag1-N6      | 2.237(3) | N6-Ag1-N5    | 141.68(10) | N6-Ag1-N10b  | 102.02(10) |
| Ag1-N10b    | 2.491(3) |              |            |              |            |
| <b>CP 9</b> |          |              |            |              |            |
| Ag1-O2a     | 2.265(6) | O2-Ag1-O2a   | 122.0(4)   | O2a-Ag1-N1   | 119.5(2)   |
| Ag1-O2      | 2.265(6) | O2-Ag1-N1    | 101.0(3)   | O2a-Ag1-N1a  | 101.0(3)   |
| Ag1-N1      | 2.408(7) | O2-Ag1-N1a   | 119.5(2)   | N1-Ag1-N1a   | 90.6(3)    |
| Ag1-N1a     | 2.408(7) | N5-Ag2-N5b   | 180.0      |              |            |
| Ag2-N5      | 2.163(7) |              |            |              |            |
| Ag2-N5a     | 2.163(7) |              |            |              |            |

Symmetry codes: a)  $1-x, y, -1-z$ , b)  $-1/2+x, -1/2+y, -1+z$ , c)  $3/2-x, -1/2+y, -z$  for CP **2a**; a)  $3/2-x, 1/2+y, 2-z$ , b)  $1/2+x, 1/2+y, 1+z$ , c)  $2-x, y, 3-z$  for CP **2b**; a)  $-1/2+x, -1/2+y, -1+z$ , b)  $3/2-x, -1/2+y, -z$ , c)  $1-x, y, -1-z$  for CP **3a**; a)  $1/2+x, 1/2+y, 1+z$ , b)  $3/2-x, 1/2+y, 2-z$ , c)  $2-x, y, 3-z$  for CP **3b**; a)  $x, 1+y, z$ , b)  $2-x, 2-y, 1-z$  for CP **4**; a)  $1+x, y, z$ , b)  $2-x, 2-y, -z$  for CP **5**; a)  $2-x, 2-y, -z$ , b)  $x, 1+y, z$  for CP **6**; a)  $2-x, 2-y, 1-z$ , b)  $x, 1+y, z$  for CP **7**; a)  $-1+x, y, z$ , b)  $-x, -y, -z$  for CP **8**; a)  $1-x, y, 3/2-z$ , b)  $2-x, -1-y, 1-z$  for CP **9**.
